# Supplementary material for: A thermally self-sustained micro solid-oxide fuel-cell stack with high power density
Source: Springer Nature journal article supplement (doi:10.1038/nature03673), 2005-06-01
Supplement: nature03673-s2.pdf [file nature03673-s2.pdf]

## Impedance spectroscopy of the thermally self-sustained fuel cells.

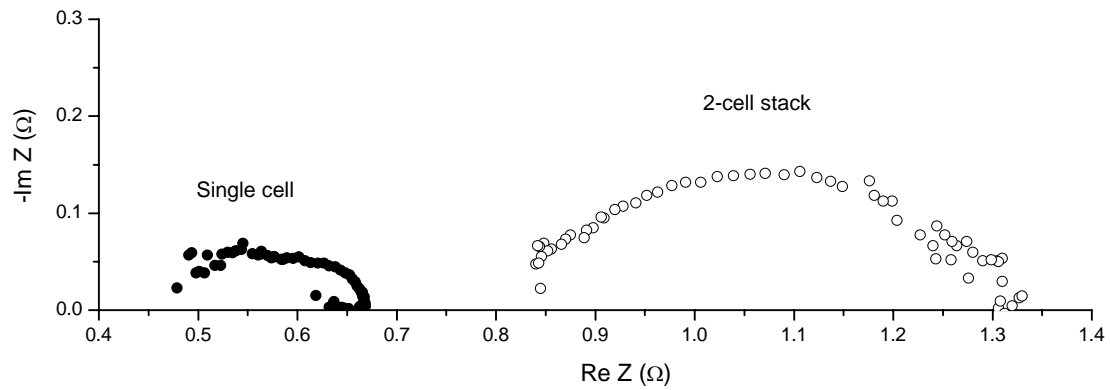

**Supplementary Figure. 1** The impedance spectroscopy of the single cell and 2-cell stack under temperature self-sustained condition at a feed composition of  $40 \text{ ml}\cdot\text{min}^{-1} \text{ C}_3\text{H}_8 + 90 \text{ ml}\cdot\text{min}^{-1} \text{ O}_2 + 360 \text{ ml}\cdot\text{min}^{-1} \text{ He}$  (all at STP). The temperature of the fuel cell is corresponding to  $\sim 580 \text{ }^\circ\text{C}$  for single cell and  $\sim 575 \text{ }^\circ\text{C}$  for the two-cell stack. Impedance measurement was conducted under OCV condition using combined Solartron 1260A frequency response analyzer and PAR EG&G 273A Potentiostat/Galvonostat. The electrolyte resistance was responsible for  $\sim 65\%$  of the total fuel cell resistance.
